# Supplementary material for: Ab Initio Identification of Novel Regulatory Elements in the Genome of Trypanosoma brucei by Bayesian Inference on Sequence Segmentation
Source: PubMed Central journal article supplement (PMC3185004; doi:10.1371/journal.pone.0025666), 2011-10-03

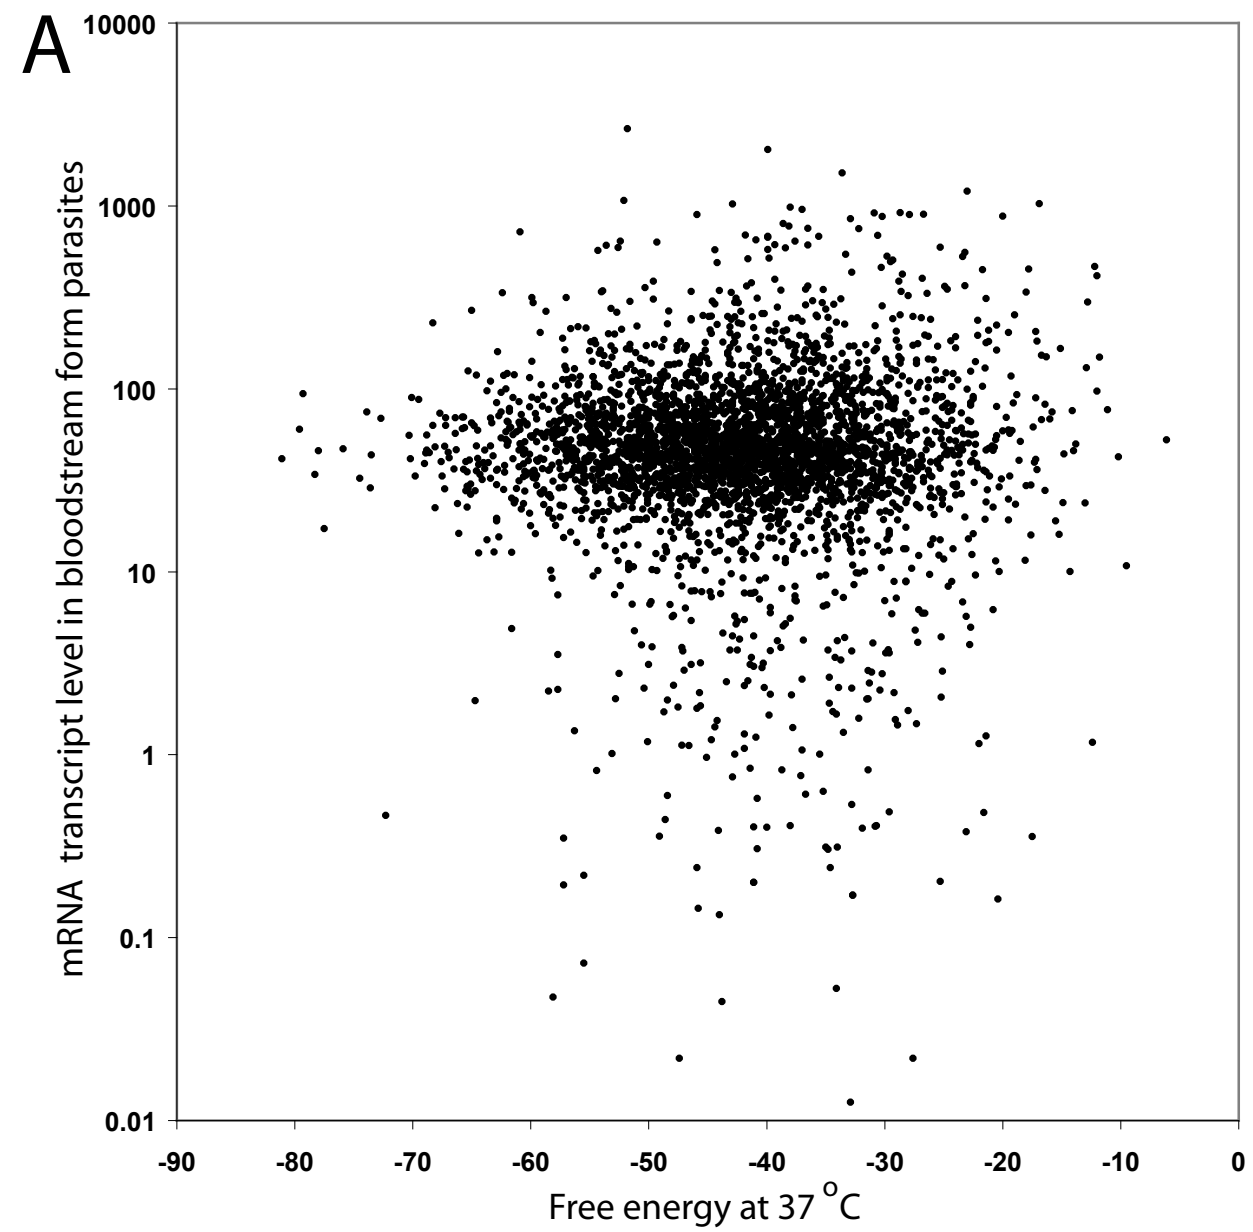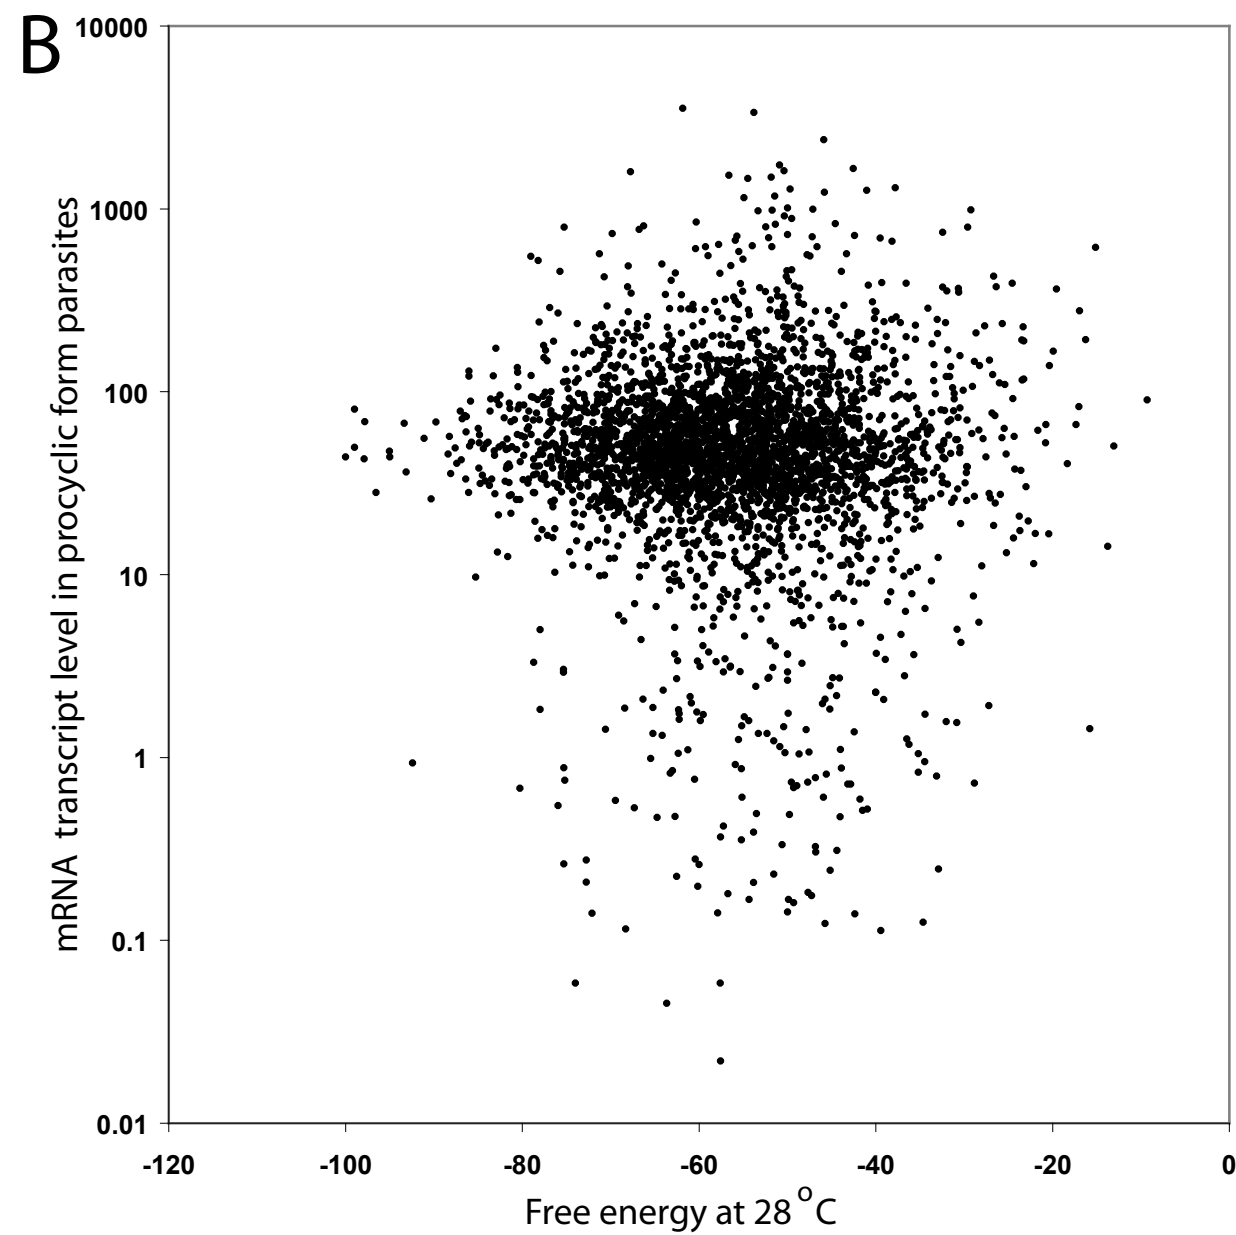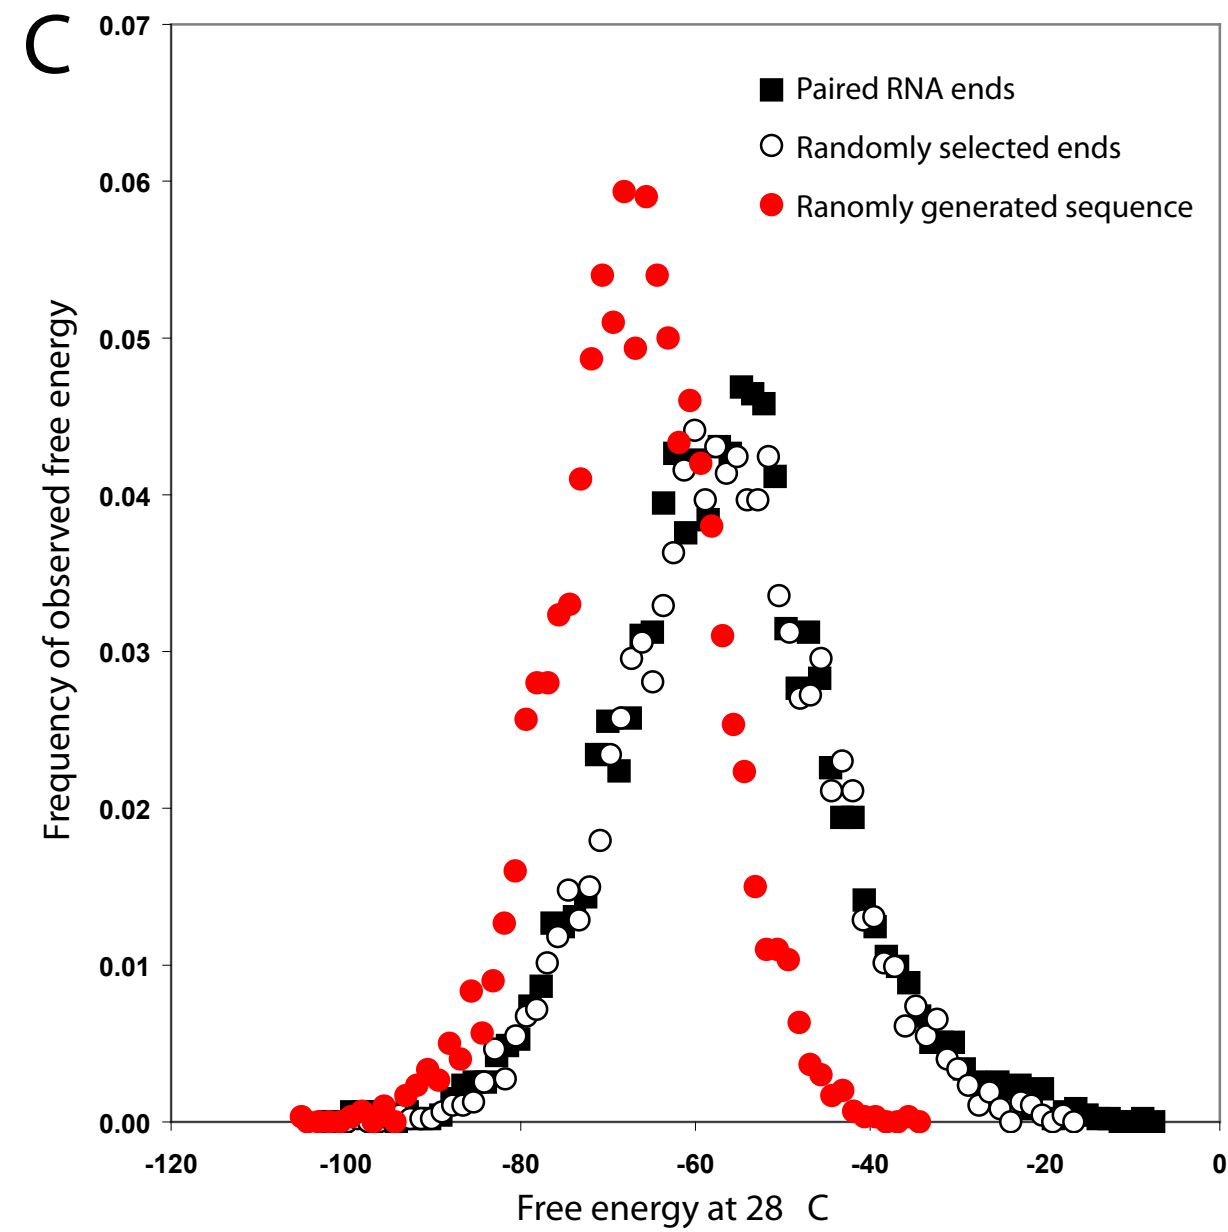

Supplement: pone.0025666.s008.pdf [file pone.0025666.s008.pdf]
